# Supplementary material for: Enhancing neural collaborative filtering using hybrid feature selection for recommendation
Source: PeerJ journal article supplement (doi:10.7717/peerj-cs.1456), 2023-08-28

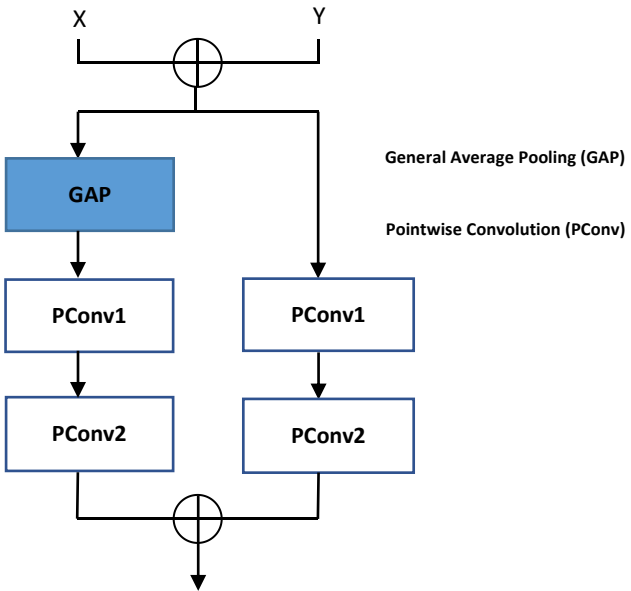

Supplement: HybridFeatureSelection.pdf [file HybridFeatureSelection.pdf]
